# Supplementary material for: Lack of improvement in sepsis care on the wards: results of four consecutive yearly point-prevalence studies in Wales
Source: Research Square preprint supplement (doi:10.21203/rs.3.rs-379786/v1), 2021-04-03
Supplement: Supplementary file [file eba0a42c17aba90ce5816b65.pdf]

# Sepsis/Severe Sepsis Screening Tool

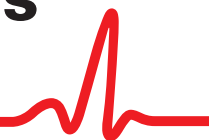

## Are any two of the following SSI criteria present?

- |                                                                       |                                                                    |
|-----------------------------------------------------------------------|--------------------------------------------------------------------|
| <input type="checkbox"/> Temperature $<36$ or $>38.3^{\circ}\text{C}$ | <input type="checkbox"/> Respiratory rate $>20/\text{min}$         |
| <input type="checkbox"/> Heart rate $>90\text{bpm}$                   | <input type="checkbox"/> Acutely altered mental state              |
| <input type="checkbox"/> WCC $>12$ or $<4 \times 10^9/\text{l}$       | <input type="checkbox"/> Hyperglycaemia in the absence of diabetes |

**If yes, patient has SSI**

## Does your patient have a history or signs suggestive of a new infection? For example:

- |                                                           |                                                                        |
|-----------------------------------------------------------|------------------------------------------------------------------------|
| <input type="checkbox"/> Cough/ sputum/ chest pain        | <input type="checkbox"/> Dysuria                                       |
| <input type="checkbox"/> Abdo pain/ distension/ diarrhoea | <input type="checkbox"/> Headache with neck stiffness                  |
| <input type="checkbox"/> Line infection                   | <input type="checkbox"/> Cellulitis/ wound infection/ septic arthritis |
| <input type="checkbox"/> Endocarditis                     |                                                                        |

**If yes, patient has SEPSIS**

## Any signs of organ dysfunction?

- |                                                                         |                                                                            |
|-------------------------------------------------------------------------|----------------------------------------------------------------------------|
| <input type="checkbox"/> SBP $< 90\text{mmHg}$ or MAP $< 65\text{mmHg}$ | <input type="checkbox"/> Lactate $> 2\text{mmol/l}$                        |
| <input type="checkbox"/> Urine output $< 0.5\text{ml/kg/hr}$ for 2 hrs  | <input type="checkbox"/> New need for oxygen to keep $\text{SpO}_2 > 90\%$ |
| <input type="checkbox"/> INR $> 1.5$ or aPTT $> 60\text{s}$             | <input type="checkbox"/> Platelets $< 100 \times 10^9/\text{l}$            |
| <input type="checkbox"/> Bilirubin $> 34\mu\text{mol/l}$                | <input type="checkbox"/> Creatinine $> 177 \text{ mmol/l}$                 |

### If no, treat for **SEPSIS**:

- Oxygen
- Blood cultures
- IV antibiotics
- Fluid therapy
- Reassess for SEVERE SEPSIS with hourly observations

### If yes, patient has **SEVERE SEPSIS**

Start SEVERE SEPSIS CARE PATHWAY

# Document to be kept in patient's notes

Patient name:

PID:

Date:

Ward:

## Severe Sepsis Care Pathway – First Hour Care Duties

Yes

Could this patient have sepsis?

No

Yes

Apply Severe Sepsis Screening Tool

Negative

Reassess patient Apply appropriate Management plan

| Sepsis Six <sup>©</sup>                                                                                                                                            | Time | Initial | Reason not done or result |
|--------------------------------------------------------------------------------------------------------------------------------------------------------------------|------|---------|---------------------------|
| 1. <b>Oxygen:</b> high flow 15l/min via non-rebreathe mask.<br>Target saturations > 94%                                                                            |      |         |                           |
| 2. <b>Blood cultures:</b> take at least one set plus all relevant blood tests eg FBC, U&E, LFT, clotting, glucose.<br><i>Consider urine/ sputum/ swab samples.</i> |      |         |                           |
| 3. <b>IV antibiotics</b> as per trust guidelines                                                                                                                   |      |         |                           |
| 4. <b>Fluid resuscitate:</b> if hypotensive give boluses of 0.9% saline or Hartmann's 20 ml/kg up to a max of 60ml/kg                                              |      |         |                           |
| 5. <b>Serum lactate</b> and Hb: ABG<br>Ensure Hb > 7g/dl                                                                                                           |      |         |                           |
| 6. <b>Catheterise</b> and commence fluid balance                                                                                                                   |      |         |                           |

### Plus

Referral to Critical Care.

Do you need to discuss with your consultant – on-call first?

Please think before referring is this episode reversible? Have all the above been completed and the patient reviewed within one hour and a PMH/Co-morbidity history taken?

One hour time check: all steps done?

Yes ☐ No ☐

Name:

Signature:

Designation:

Bleep No.:

Patient name:

PID:

Date:

Ward:

6 Hour Resuscitation Bundle (assisted care)

Yes

No

Septic shock present!

Confirm first hour care duties complete  
**Apply Early Goal Directed Therapy**

Lactate>4mmol/l?

Yes

No

**Severe sepsis, no shock**  
Ensure management plan is documented in notes  
Ensure hourly obs taken, recorded and acted upon.  
REASSESS frequently!

|                                                                                                                                                                         | Time achieved | Initial | Reason not done or result |
|-------------------------------------------------------------------------------------------------------------------------------------------------------------------------|---------------|---------|---------------------------|
| 1. Ensure patient has received adequate <b>fluid resuscitation:</b><br>boluses of 20ml/kg 0.9% saline or Hartmann's to a max of 60ml/kg                                 |               |         |                           |
| 2. If still shocked ( <i>low BP/ low urine output/ high lactate</i> )<br>Ensure <b>Critical Care</b> attend urgently                                                    |               |         |                           |
| 3. If still shocked ( <i>low BP/ low urine output/ high lactate</i> ) <b>insert central venous catheter</b> under USS guidance (only if competent; otherwise seek help) |               |         |                           |
| 4. Aim to achieve <b>CVP 8-12mmHg</b><br>with Care,Check CVP Monitor                                                                                                    |               |         |                           |
| 5. Take heparinised sample from central line (use ABG syringe): check <b>ScvO2&gt;70%</b>                                                                               |               |         |                           |
| 6. Ensure <b>Hb&gt;7g/dl</b> : consider transfusion if necessary                                                                                                        |               |         |                           |
| 7. Consider <b>noradrenaline</b> if still shocked or <b>dobutamine</b> if ScvO2 < 70%                                                                                   |               |         |                           |

6 hour time check:

Name:

Designation:

All steps complete? Yes ☐ No ☐

Signature:

Bleep/ID Card No.:

# SBAR Reporting

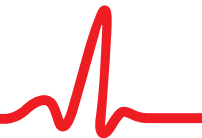

|          |                                                                                                                                                                                                                                |
|----------|--------------------------------------------------------------------------------------------------------------------------------------------------------------------------------------------------------------------------------|
| <b>S</b> | Date: ..... Time: ..... (24hrs)<br>Drs name: .....<br>My name is .....<br>From Ward/Dept .....<br>I am calling about (patient name) .....<br>The problem is .....                                                              |
| <b>B</b> | The patient was admitted with .....<br>on ...../...../.....<br>Relevant PMH .....<br>Resuscitation status .....                                                                                                                |
| <b>A</b> | The patient has a PAR score of .....<br>Airway .....<br>Breathing .....<br>Circulation .....<br>Disability .....<br>Exposure .....<br>Other relevant factors e.g. Sepsis screening, blood results, pain, urine output<br>..... |
| <b>R</b> | I request you review the patient within the next ..... hrs/mins<br>(enter agreed timescale e.g. 30mins)<br>Document any initial instructions<br>.....<br>.....<br>Patient reviewed by Dr at ..... (24hrs)                      |
